# Supplementary material for: Alzheimer’s disease phospholipase C-gamma-2 (PLCG2) protective variant is a functional hypermorph
Source: PubMed Central journal article supplement (PMC6359863; doi:10.1186/s13195-019-0469-0), 2019-02-02

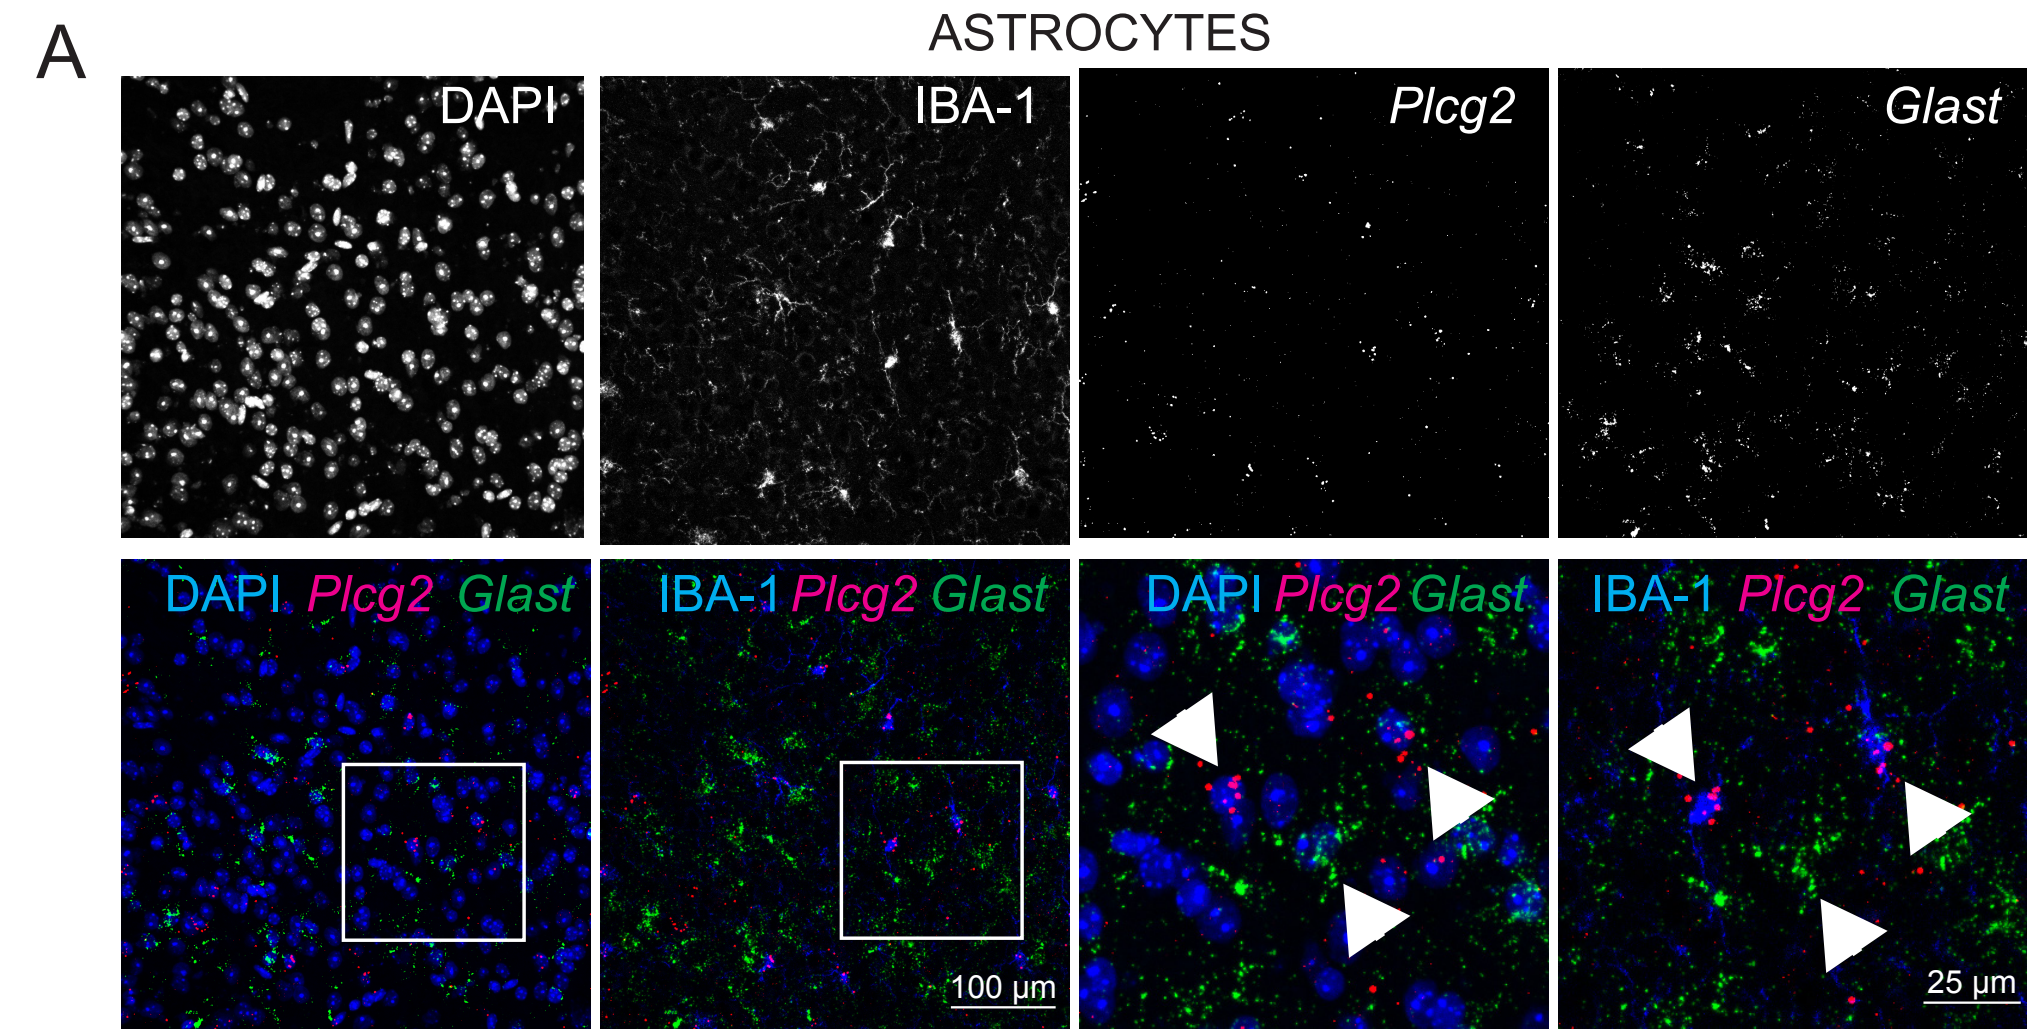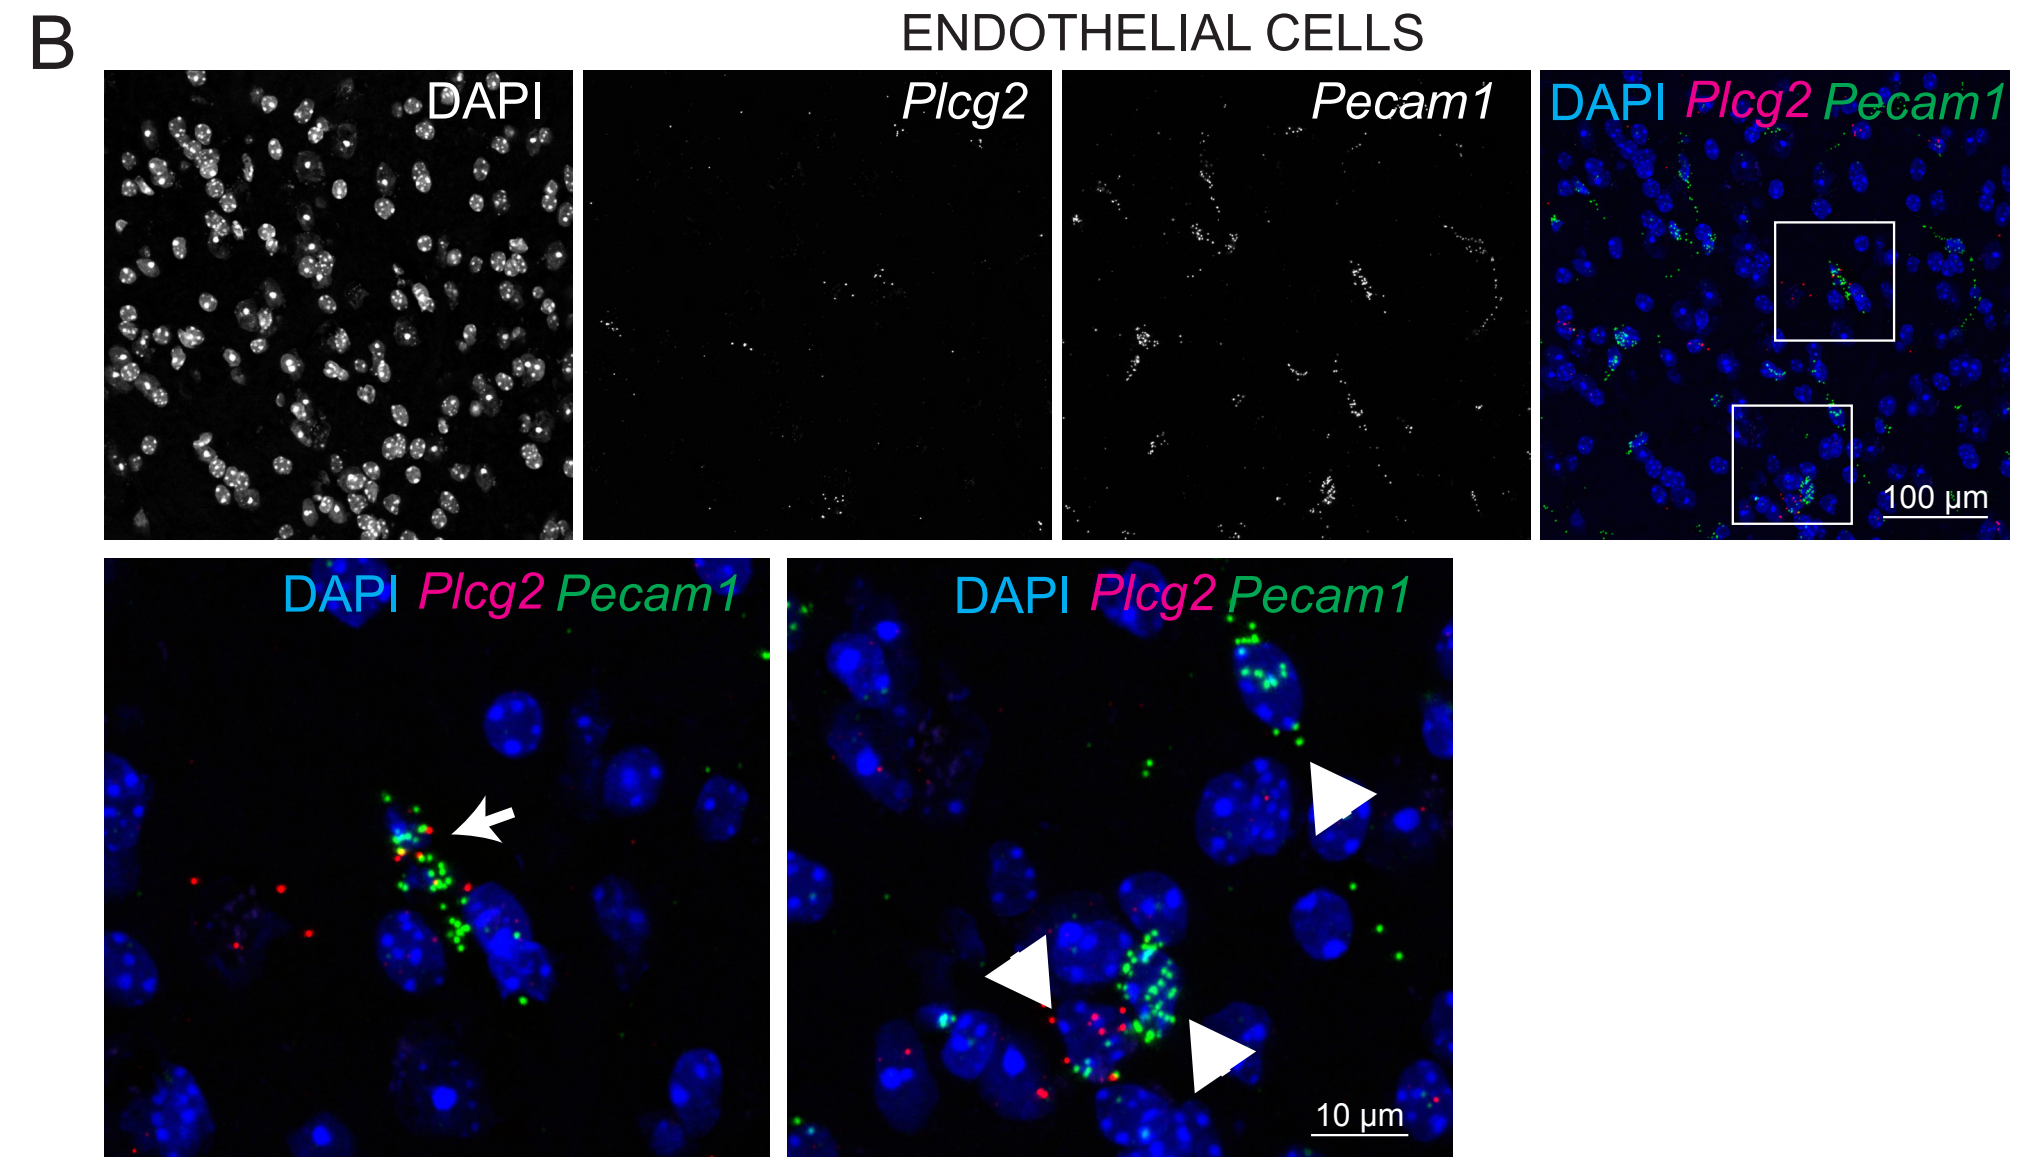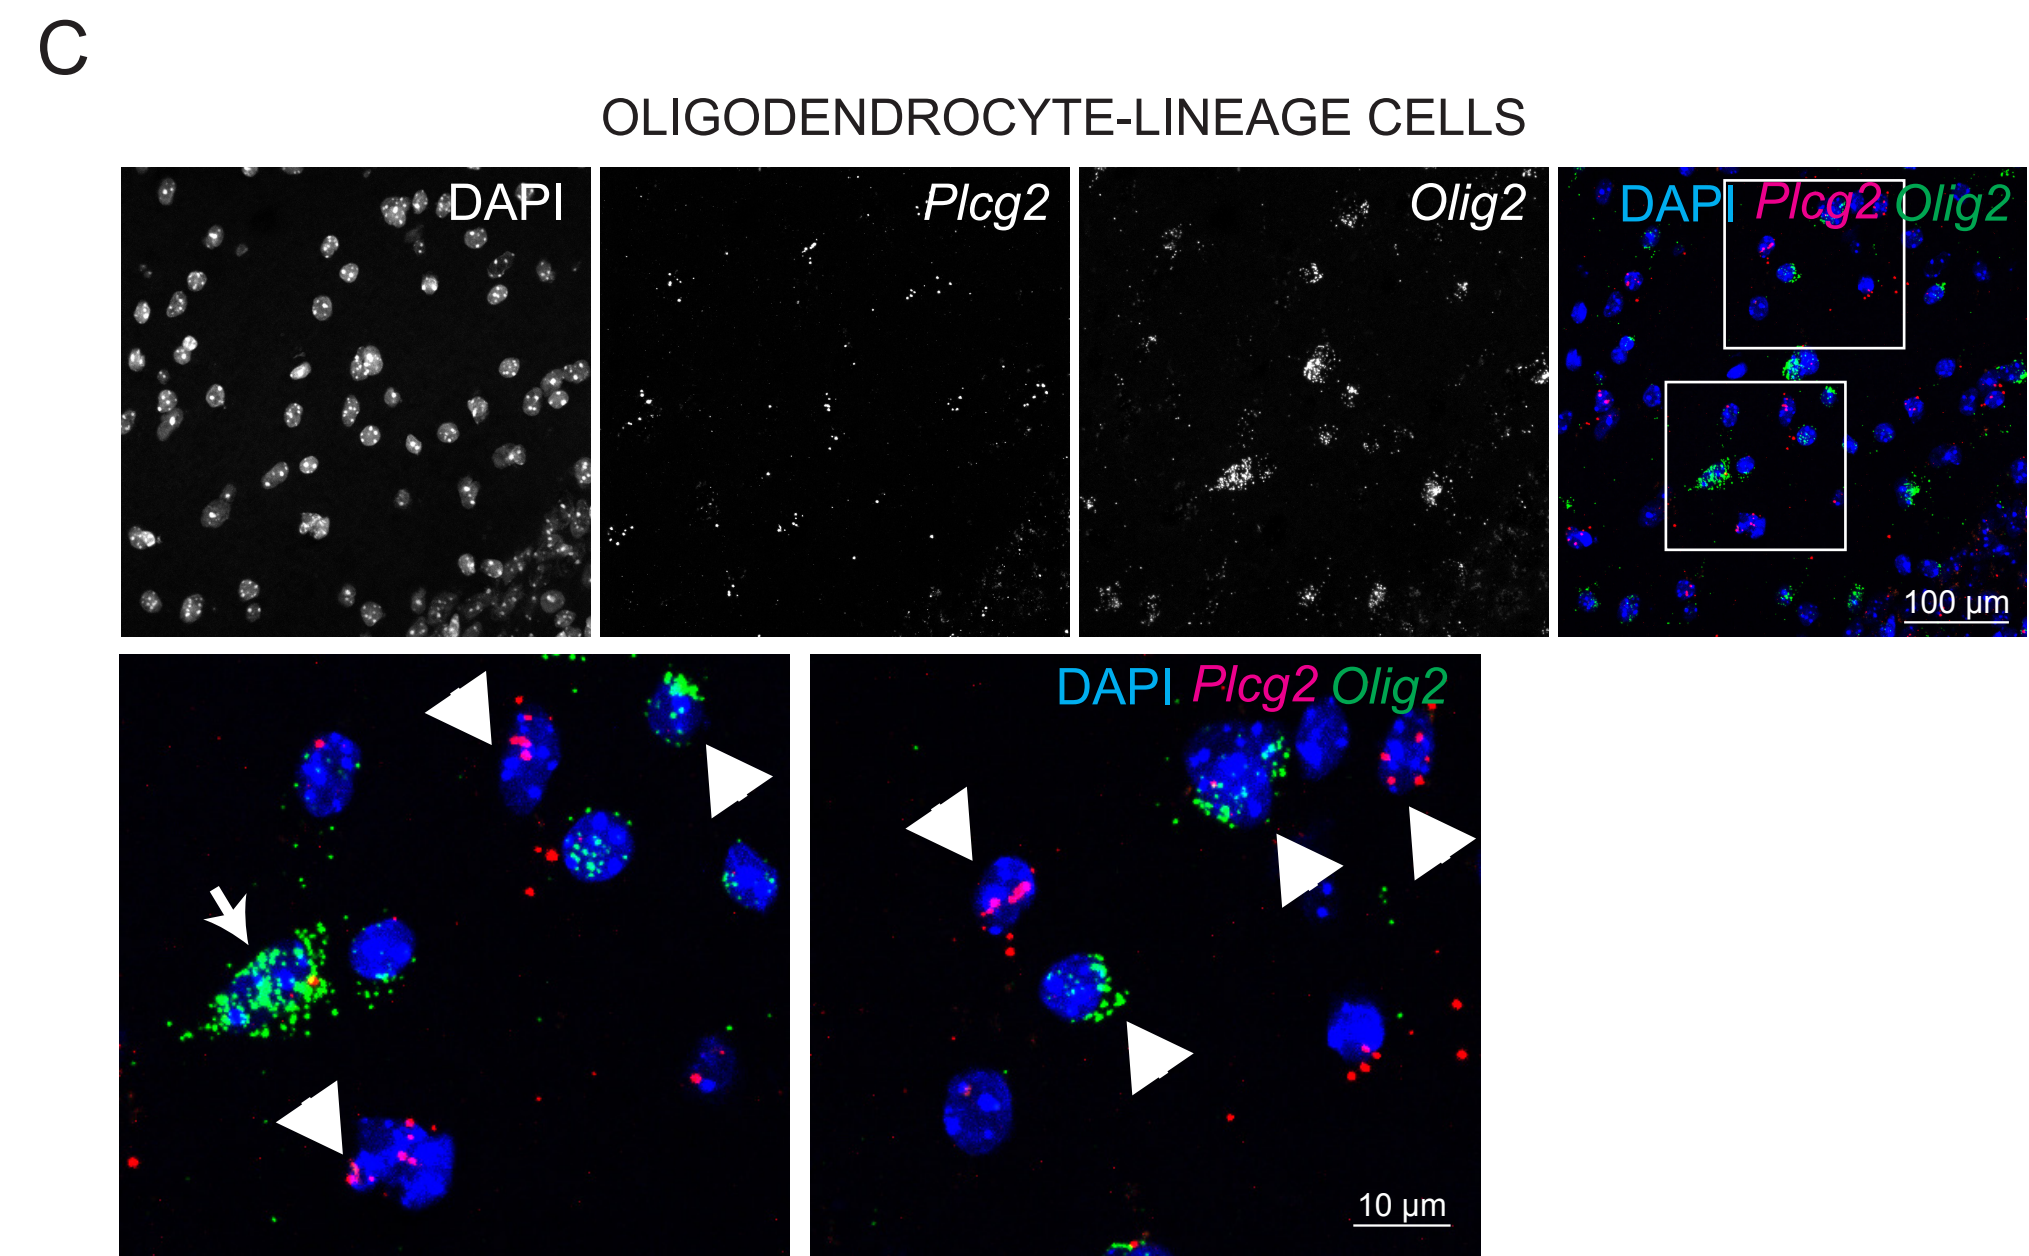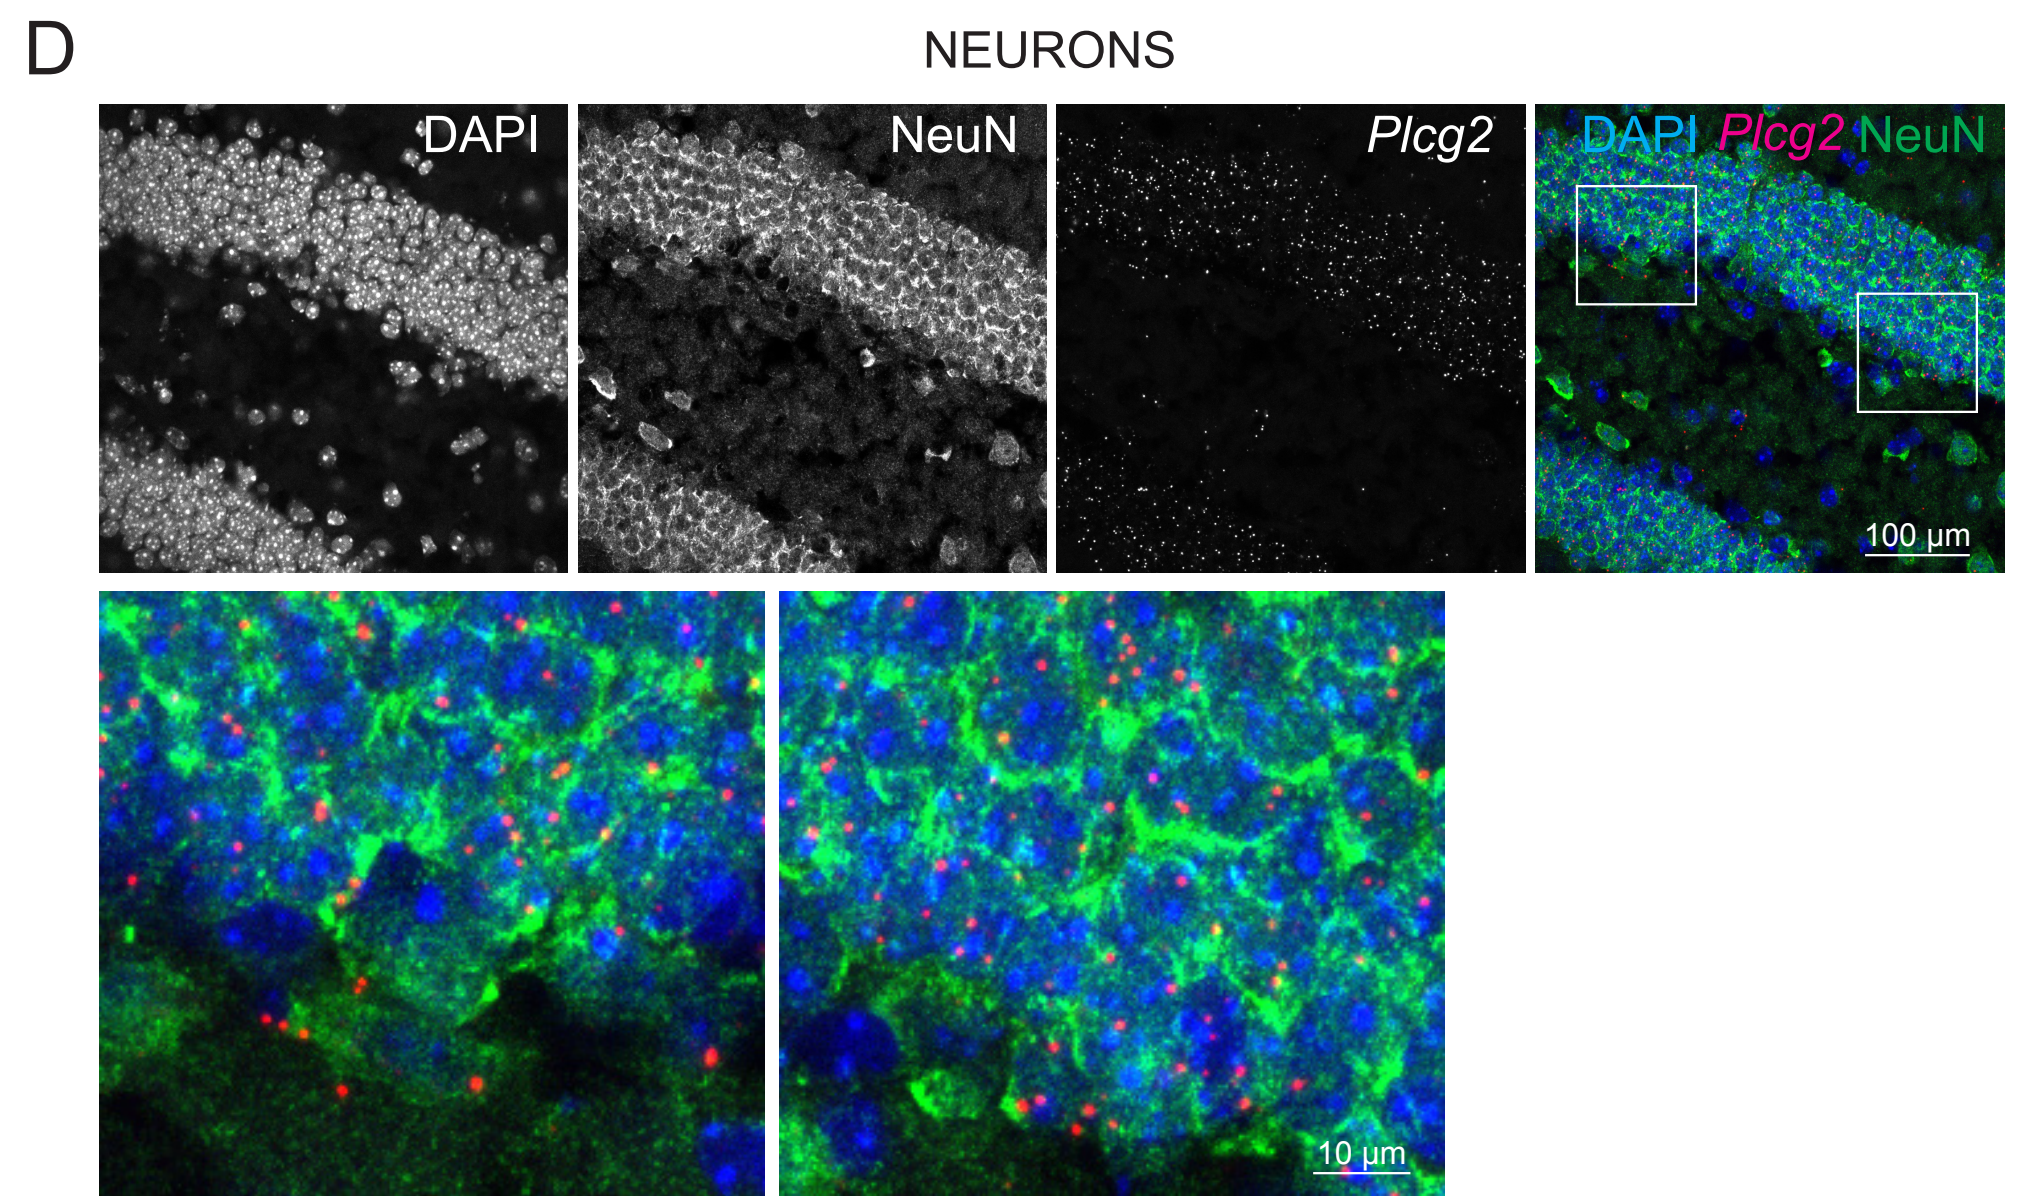

Supplement: 13195_2019_469_MOESM2_ESM.pdf [file 13195_2019_469_MOESM2_ESM.pdf]
