# Supplementary material for: Alzheimer’s disease phospholipase C-gamma-2 (PLCG2) protective variant is a functional hypermorph
Source: PubMed Central journal article supplement (PMC6359863; doi:10.1186/s13195-019-0469-0), 2019-02-02
Supplement: 13195_2019_469_MOESM3_ESM.pdf [file 13195_2019_469_MOESM3_ESM.pdf]

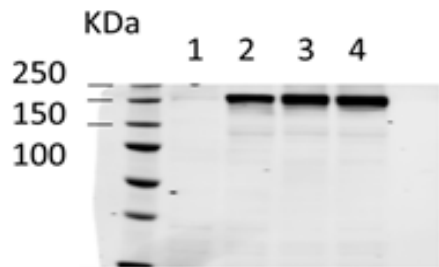

EGFR

- 1 - mock
- 2 - EGFR
- 3 - EGFR + PLC $\gamma$ 2
- 4 - EGFR + p.P522R

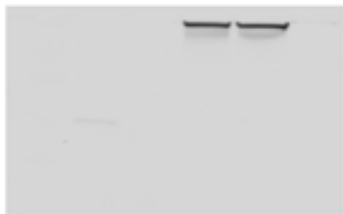

PLC $\gamma$ 2
